# Supplementary material for: FOXD1 mutations are related to repeated implantation failure, intra-uterine growth restriction and preeclampsia
Source: PubMed Central journal article supplement (PMC6688323; doi:10.1186/s10020-019-0104-3), 2019-08-08
Supplement: 10020_2019_104_MOESM2_ESM.pdf [file 10020_2019_104_MOESM2_ESM.pdf]

p.His267Tyr

|                                    |     |                                                              |     |
|------------------------------------|-----|--------------------------------------------------------------|-----|
| <i>Homo sapiens</i>                | 260 | PAPPPPPHAYGYGPGYGCYGLQLPPYAPPSALFAAAAAAAAAAAAFHPSPP-----PPP  | 313 |
| <i>Monodelphis domestica</i>       | 289 | PAPPPPPHAYGYGPYSCGYGLQLQPYPPPSALFAAFHPHPAAAHHPHSHP-HSPPPPPP  | 347 |
| <i>Pan troglodytes</i>             | 241 | PAPPPPPHAYGYGPGYGCYGLQLPPYAPPSALFAAAAAAAAAAAAFHPSPPP-----P   | 293 |
| <i>Sus scrofa</i>                  | 262 | PAPPPPPHAYGYGPGYGCYGLQLPPYPPPSALFAAAA--AAAAAFHPSPP-----PPP   | 313 |
| <i>Cebus capucinus imitator</i>    | 263 | PAPPPPPHAYGYGPGYGCYGLQLPPYAPPSALFAAAAAAAAAAAAFHPSPP-----PPP  | 316 |
| <i>Odobenus rosmarus divergens</i> | 249 | PAPPPPPHAYGYGPGYGCYGLQLPPYAPPSALFAAAAAAAAAAAAFHPSPPRRRPPPPPP | 308 |
| <i>Delphinapterus leucas</i>       | 269 | PAPPPPPHAYGYGPGYGCYGLQLPSYAPPSALFAAAA--AAAAAFHPSPPP---PPPPP  | 323 |
